# Supplementary material
Source: MDPI journal article supplement (https://www.mdpi.com/2311-5637/9/6/501)
Supplement: s1 [file s1]

# Genomic Insight and Optimization of Astaxanthin Production from a new *Rhodotorula* sp. CP72-2

Engkarat Kingkaew<sup>1</sup>, Nisachon Tedsree<sup>2</sup>, Sukanya Phuengjayaem<sup>3</sup>, Pornchai Rojsitthisak<sup>4</sup>, Boonchoo Sritularak<sup>5</sup>, Worathat Thitikornpong<sup>4</sup>, Somphob Thompho<sup>6</sup>, Wuttichai Mhuantong<sup>7</sup>, and Somboon Tanasupawat<sup>1,\*</sup>

<sup>1</sup>Department of Biochemistry and Microbiology, Faculty of Pharmaceutical Sciences, Chulalongkorn University, Bangkok 10330, Thailand

<sup>2</sup>Faculty of Science and Arts, Burapha University, Chanthaburi Campus, Chanthaburi 22170, Thailand

<sup>3</sup>Department of Microbiology, Faculty of Science, King Mongkut's University of Technology Thonburi, Bangkok 10140, Thailand

<sup>4</sup>Department of Food and Pharmaceutical Chemistry, Faculty of Pharmaceutical Sciences, Chulalongkorn University, Bangkok 10330, Thailand

<sup>5</sup>Department of Pharmacognosy and Pharmaceutical Botany, Faculty of Pharmaceutical Sciences, Chulalongkorn University, Bangkok 10330, Thailand

<sup>6</sup>Pharmaceutical Research Instrument Center, Faculty of Pharmaceutical Sciences, Chulalongkorn University, Bangkok 10330, Thailand

<sup>7</sup>National Center for Genetic Engineering and Biotechnology (BIOTEC), National Science and Technology Development Agency (NSTDA), Pathum Thani 12120, Thailand

\*Corresponding author: Somboon Tanasupawat; Tel +66-2-218-8376, Fax +66-2-254-5195 E-mail: Somboon.T@chula.ac.th

## Supplementary Table S1 Carbon assimilation of strain CP72-2

| Substrate                 | CP72-2 |
|---------------------------|--------|
| D-Galactose               | +      |
| Cycloheximide (actidione) | -      |
| Sucrose                   | +      |

| Substrate                           | CP72-2 |
|-------------------------------------|--------|
| N-acetyl-glucosamine                | -      |
| Lactic acid                         | -      |
| L-Arabinose                         | -      |
| D-Cellobiose                        | -      |
| D-Raffinose                         | +      |
| D-Maltose                           | -      |
| D-Trehalose                         | +      |
| Potassium 2-ketogluconate           | +      |
| Methyl- $\alpha$ -D-Glucopyranoside | -      |
| D-Mannitol                          | +      |
| D-Lactose (bovine origin)           | -      |
| Inositol                            | -      |
| No substrate                        | -      |
| D-Sorbitol                          | +      |
| D-Xylose                            | +      |
| D-Ribose                            | -      |
| Glycerol                            | +      |
| L-Rhamnose                          | -      |
| Palatinose                          | +      |
| Erythritol                          | -      |
| D-Melibiose                         | -      |
| Sodium glucuronate                  | -      |
| D-Melezitose                        | -      |
| Potassium gluconate                 | +      |
| Levulinic acid (levulinate)         | -      |
| D-Glucose                           | +      |
| L-Sorbose                           | -      |
| Glucosamine                         | -      |
| Esculin ferric citrate              | +      |

(-) negative test, (+) positive test

**Supplementary Table S2** ANI (%) values between the draft genomes of the *Rhodotorula* sp. CP72-2; *R. kratochvilovae* CBS 7436<sup>T</sup>; *R. kratochvilovae* LS11; *R. kratochvilovae* YM25235; *R. babjevae* CBS 7808<sup>T</sup>; *R. diobovata* UCD-FST 08-225; *R. glutinis* ZHK; *R. graminis* WP1; and *R. paludigena* CM33

**Genomic data:** 1, *Rhodotorula* sp. CP72-2 (PRJNA938253); 2, *R. kratochvilovae* CBS 7436<sup>T</sup> (JACAVT000000000); 3, *R. kratochvilovae* LS11 (PQDI000000000); 4, *R. kratochvilovae* YM25235 (JAHSUG000000000); 5, *R. babjevae* CBS 7808<sup>T</sup> (CAKKSZ000000000); 6, *R. diobovata* UCD-FST 08-225 (SOZI000000000); 7, *R. glutinis* ZHK (JAAGPT000000000); 8, *R. graminis* WP1 (JTAO000000000); 9, *R. paludigena* CM33 (SWEA000000000)

| Query genome | Reference genome | ANI (%) |
|--------------|------------------|---------|
| 1            | 2                | 83.1646 |
| 1            | 3                | 83.1079 |
| 1            | 4                | 83.0901 |
| 1            | 5                | 80.3203 |
| 1            | 6                | 80.2167 |
| 1            | 7                | 80.1658 |
| 1            | 8                | 80.0865 |
| 1            | 9                | 79.3643 |

\*Data obtained from FASTANI

**Statistical supplementary Table S3** The effect of different carbon sources on astaxanthin production and growth of *Rhodotorula* sp. CP72-2

**ANOVA**

|                                |                | Sum of Squares | df | Mean Square | F       | Sig. |
|--------------------------------|----------------|----------------|----|-------------|---------|------|
| Astaxanthin content (µg/g DCW) | Between Groups | 8207.728       | 3  | 2735.909    | 76.788  | .000 |
|                                | Within Groups  | 285.035        | 8  | 35.629      |         |      |
|                                | Total          | 8492.763       | 11 |             |         |      |
| Astaxanthin yield (mg/L)       | Between Groups | 1.514          | 3  | .505        | 119.935 | .000 |
|                                | Within Groups  | .034           | 8  | .004        |         |      |
|                                | Total          | 1.548          | 11 |             |         |      |
| Biomass (g/L)                  | Between Groups | 20.032         | 3  | 6.677       | 146.728 | .000 |
|                                | Within Groups  | .364           | 8  | .046        |         |      |
|                                | Total          | 20.396         | 11 |             |         |      |

**Astaxanthin content (ug/g DCW)**

| Carbon source   |          | N | Subset for alpha = 0.05 |                    |
|-----------------|----------|---|-------------------------|--------------------|
|                 |          |   | 1                       | 2                  |
| Tukey<br>HSD(a) | fructose | 3 | 217.88000               | 281.60000<br>1.000 |
|                 | maltose  | 3 | 221.23000               |                    |
|                 | sucrose  | 3 | 225.45333               |                    |
|                 | glucose  | 3 |                         |                    |
|                 | Sig.     |   | .453                    |                    |
| Duncan(a)       | fructose | 3 | 217.88000               | 281.60000<br>1.000 |
|                 | maltose  | 3 | 221.23000               |                    |
|                 | sucrose  | 3 | 225.45333               |                    |
|                 | glucose  | 3 |                         |                    |
|                 | Sig.     |   | .174                    |                    |

Means for groups in homogeneous subsets are displayed.

a Uses Harmonic Mean Sample Size = 3.000.

**Astaxanthin yield (mg/L)**

| Carbon source   |          | N | Subset for alpha = 0.05 |         |         |
|-----------------|----------|---|-------------------------|---------|---------|
|                 |          |   | 1                       | 2       | 3       |
| Tukey<br>HSD(a) | maltose  | 3 | .77483                  |         |         |
|                 | fructose | 3 |                         | 1.40563 |         |
|                 | sucrose  | 3 |                         | 1.52070 |         |
|                 | glucose  | 3 |                         |         | 1.72663 |
|                 | Sig.     |   | 1.000                   | .210    | 1.000   |

|           |          |   |        |         |         |
|-----------|----------|---|--------|---------|---------|
| Duncan(a) | maltose  | 3 | .77483 |         |         |
|           | fructose | 3 |        | 1.40563 |         |
|           | sucrose  | 3 |        | 1.52070 |         |
|           | glucose  | 3 |        |         | 1.72663 |
|           | Sig.     |   | 1.000  | .062    | 1.000   |

Means for groups in homogeneous subsets are displayed.

a Uses Harmonic Mean Sample Size = 3.000.

#### Biomass (g/L)

| Carbon source |          | N | Subset for alpha = 0.05 |         |         |
|---------------|----------|---|-------------------------|---------|---------|
|               |          |   | 1                       | 2       | 3       |
| Tukey HSD(a)  | maltose  | 3 | 3.50133                 |         |         |
|               | glucose  | 3 |                         | 6.13133 |         |
|               | fructose | 3 |                         | 6.45133 | 6.45133 |
|               | sucrose  | 3 |                         |         | 6.74533 |
|               | Sig.     |   | 1.000                   | .324    | .389    |
| Duncan(a)     | maltose  | 3 | 3.50133                 |         |         |
|               | glucose  | 3 |                         | 6.13133 |         |
|               | fructose | 3 |                         | 6.45133 | 6.45133 |
|               | sucrose  | 3 |                         |         | 6.74533 |
|               | Sig.     |   | 1.000                   | .103    | .130    |

Means for groups in homogeneous subsets are displayed.

a Uses Harmonic Mean Sample Size = 3.000.

**Statistical supplementary Table S4** The effect of glucose concentration on astaxanthin production and growth of *Rhodotorula* sp. CP72-2

**ANOVA**

|                                |                | Sum of Squares | df | Mean Square | F        | Sig. |
|--------------------------------|----------------|----------------|----|-------------|----------|------|
| Astaxanthin content (µg/g DCW) | Between Groups | 13919.437      | 4  | 3479.859    | 76.182   | .000 |
|                                | Within Groups  | 456.783        | 10 | 45.678      |          |      |
|                                | Total          | 14376.221      | 14 |             |          |      |
| Astaxanthin yield (mg/L)       | Between Groups | 11.061         | 4  | 2.765       | 178.146  | .000 |
|                                | Within Groups  | .155           | 10 | .016        |          |      |
|                                | Total          | 11.216         | 14 |             |          |      |
| Biomass (g/L)                  | Between Groups | 216.540        | 4  | 54.135      | 1759.581 | .000 |
|                                | Within Groups  | .308           | 10 | .031        |          |      |
|                                | Total          | 216.848        | 14 |             |          |      |

**Astaxanthin content (µg/g DCW)**

| Glucose concentra-<br>tion |        | N | Subset for alpha = 0.05 |           |           |
|----------------------------|--------|---|-------------------------|-----------|-----------|
|                            |        |   | 1                       | 2         | 3         |
| Tukey<br>HSD(a)            | 50 g/L | 3 | 250.87667               |           |           |
|                            | 40 g/L | 3 | 259.27667               | 259.27667 |           |
|                            | 10 g/L | 3 |                         | 271.92667 |           |
|                            | 30 g/L | 3 |                         | 276.39000 |           |
|                            | 20 g/L | 3 |                         |           | 337.33667 |
|                            | Sig.   |   | .572                    | .067      | 1.000     |
| Duncan(a)                  | 50 g/L | 3 | 250.87667               |           |           |
|                            | 40 g/L | 3 | 259.27667               |           |           |
|                            | 10 g/L | 3 |                         | 271.92667 |           |
|                            | 30 g/L | 3 |                         | 276.39000 |           |
|                            | 20 g/L | 3 |                         |           | 337.33667 |
|                            | Sig.   |   | .159                    | .437      | 1.000     |

Means for groups in homogeneous subsets are displayed.

a Uses Harmonic Mean Sample Size = 3.000.

**Astaxanthin yield (mg/L)**

| Glucose concentration |        | N | Subset for alpha = 0.05 |         |   |   |   |
|-----------------------|--------|---|-------------------------|---------|---|---|---|
|                       |        |   | 1                       | 2       | 3 | 4 | 5 |
| Tukey                 | 10 g/L | 3 | 1.59803                 |         |   |   |   |
| HSD(a)                | 20 g/L | 3 |                         | 2.83603 |   |   |   |

|        |        |   |         |         |         |         |         |
|--------|--------|---|---------|---------|---------|---------|---------|
|        | 30 g/L | 3 |         | 3.11533 |         |         |         |
|        | 40 g/L | 3 |         |         | 3.63503 |         |         |
|        | 50 g/L | 3 |         |         |         | 4.13980 |         |
|        | Sig.   |   | 1.000   | .116    | 1.000   | 1.000   |         |
| Dun-   | 10 g/L | 3 | 1.59803 |         |         |         |         |
| can(a) | 20 g/L | 3 |         | 2.83603 |         |         |         |
|        | 30 g/L | 3 |         |         | 3.11533 |         |         |
|        | 40 g/L | 3 |         |         |         | 3.63503 |         |
|        | 50 g/L | 3 |         |         |         |         | 4.13980 |
|        | Sig.   |   | 1.000   | 1.000   | 1.000   | 1.000   | 1.000   |

Means for groups in homogeneous subsets are displayed.

a Uses Harmonic Mean Sample Size = 3.000.

### Biomass (g/L)

| Glucose concentration |        | N | Subset for alpha = 0.05 |         |          |          |          |
|-----------------------|--------|---|-------------------------|---------|----------|----------|----------|
|                       |        |   | 1                       | 2       | 3        | 4        | 5        |
| Tukey<br>HSD(a)       | 10 g/L | 3 | 5.87667                 |         |          |          |          |
|                       | 20 g/L | 3 |                         | 8.40333 |          |          |          |
|                       | 30 g/L | 3 |                         |         | 11.27200 |          |          |
|                       | 40 g/L | 3 |                         |         |          | 14.01667 |          |
|                       | 50 g/L | 3 |                         |         |          |          | 16.49933 |
|                       | Sig.   |   | 1.000                   | 1.000   | 1.000    | 1.000    | 1.000    |
| Dun-<br>can(a)        | 10 g/L | 3 | 5.87667                 |         |          |          |          |
|                       | 20 g/L | 3 |                         | 8.40333 |          |          |          |
|                       | 30 g/L | 3 |                         |         | 11.27200 |          |          |
|                       | 40 g/L | 3 |                         |         |          | 14.01667 |          |
|                       | 50 g/L | 3 |                         |         |          |          | 16.49933 |
|                       | Sig.   |   | 1.000                   | 1.000   | 1.000    | 1.000    | 1.000    |

Means for groups in homogeneous subsets are displayed.

a Uses Harmonic Mean Sample Size = 3.000.

**Statistical supplementary Table S5** The effect of pH on astaxanthin production and growth of *Rhodotorula* sp. CP72-2

### ANOVA

|                                   |                | Sum of Squares | df | Mean Square | F       | Sig. |
|-----------------------------------|----------------|----------------|----|-------------|---------|------|
| Astaxanthin content<br>(µg/g DCW) | Between Groups | 9594.350       | 4  | 2398.587    | 120.526 | .000 |
|                                   | Within Groups  | 199.010        | 10 | 19.901      |         |      |
|                                   | Total          | 9793.360       | 14 |             |         |      |
|                                   |                |                |    |             |         |      |
| Astaxanthin yield<br>(mg/L)       | Between Groups | 2.584          | 4  | .646        | 31.363  | .000 |

|               |                |       |    |      |       |      |
|---------------|----------------|-------|----|------|-------|------|
| Biomass (g/L) | Within Groups  | .206  | 10 | .021 |       |      |
|               | Total          | 2.790 | 14 |      |       |      |
|               | Between Groups | 1.144 | 4  | .286 | 2.364 | .123 |
|               | Within Groups  | 1.210 | 10 | .121 |       |      |
|               | Total          | 2.354 | 14 |      |       |      |
|               |                |       |    |      |       |      |

#### Astaxanthin content (µg/g DCW)

| pH           |        | N | Subset for alpha = 0.05 |           |           |           |           |
|--------------|--------|---|-------------------------|-----------|-----------|-----------|-----------|
|              |        |   | 1                       | 2         | 3         | 4         | 5         |
| Tukey HSD(a) | pH 8.5 | 3 | 202.37667               |           |           |           |           |
|              | pH 7.5 | 3 |                         | 234.18667 |           |           |           |
|              | pH 6.5 | 3 |                         |           | 248.93000 |           |           |
|              | pH 5.5 | 3 |                         |           | 257.91667 |           |           |
|              | pH 4.5 | 3 |                         |           |           | 277.93667 |           |
|              | Sig.   |   | 1.000                   | 1.000     | .175      | 1.000     |           |
| Duncan(a)    | pH 8.5 | 3 | 202.37667               |           |           |           |           |
|              | pH 7.5 | 3 |                         | 234.18667 |           |           |           |
|              | pH 6.5 | 3 |                         |           | 248.93000 |           |           |
|              | pH 5.5 | 3 |                         |           |           | 257.91667 |           |
|              | pH 4.5 | 3 |                         |           |           |           | 277.93667 |
|              | Sig.   |   | 1.000                   | 1.000     | 1.000     | 1.000     | 1.000     |

Means for groups in homogeneous subsets are displayed.

a Uses Harmonic Mean Sample Size = 3.000.

#### Astaxanthin yield (mg/L)

| pH           |        | N | Subset for alpha = 0.05 |         |         |
|--------------|--------|---|-------------------------|---------|---------|
|              |        |   | 1                       | 2       | 3       |
| Tukey HSD(a) | pH 8.5 | 3 | 3.53050                 |         |         |
|              | pH 7.5 | 3 |                         | 4.21920 |         |
|              | pH 6.5 | 3 |                         | 4.36653 |         |
|              | pH 5.5 | 3 |                         | 4.48497 | 4.48497 |
|              | pH 4.5 | 3 |                         |         | 4.77643 |
|              | Sig.   |   | 1.000                   | .232    | .170    |
| Duncan(a)    | pH 8.5 | 3 | 3.53050                 |         |         |
|              | pH 7.5 | 3 |                         | 4.21920 |         |
|              | pH 6.5 | 3 |                         | 4.36653 |         |
|              | pH 5.5 | 3 |                         | 4.48497 |         |
|              | pH 4.5 | 3 |                         |         | 4.77643 |

|      |  |       |      |       |
|------|--|-------|------|-------|
| Sig. |  | 1.000 | .055 | 1.000 |
|------|--|-------|------|-------|

Means for groups in homogeneous subsets are displayed.

a Uses Harmonic Mean Sample Size = 3.000.

### Biomass (g/L)

| pH              |        | N | Subset for alpha = 0.05 |         |
|-----------------|--------|---|-------------------------|---------|
|                 |        |   | 1                       | 2       |
| Tukey<br>HSD(a) | pH 4.5 | 3 | 17.1827                 |         |
|                 | pH 5.5 | 3 | 17.3893                 |         |
|                 | pH 8.5 | 3 | 17.4480                 |         |
|                 | pH 6.5 | 3 | 17.5313                 |         |
|                 | pH 7.5 | 3 | 18.0153                 |         |
|                 | Sig.   |   | .087                    |         |
| Dun-<br>can(a)  | pH 4.5 | 3 | 17.1827                 |         |
|                 | pH 5.5 | 3 | 17.3893                 | 17.3893 |
|                 | pH 8.5 | 3 | 17.4480                 | 17.4480 |
|                 | pH 6.5 | 3 | 17.5313                 | 17.5313 |
|                 | pH 7.5 | 3 | 18.0153                 | 18.0153 |
|                 | Sig.   |   | .279                    | .067    |

Means for groups in homogeneous subsets are displayed.

a Uses Harmonic Mean Sample Size = 3.000.

**Statistical supplementary Table S6** The effect of temperature on astaxanthin production and growth of *Rhodotorula* sp. CP72-2

### ANOVA

|                                   |                | Sum of Squares | df | Mean Square | F       | Sig. |
|-----------------------------------|----------------|----------------|----|-------------|---------|------|
| Astaxanthin content<br>(µg/g DCW) | Between Groups | 94195.806      | 4  | 23548.952   | 270.966 | .000 |
|                                   | Within Groups  | 869.074        | 10 | 86.907      |         |      |
|                                   | Total          | 95064.880      | 14 |             |         |      |
|                                   |                |                |    |             |         |      |
| Astaxanthin yield<br>(mg/L)       | Between Groups | 31.345         | 4  | 7.836       | 384.167 | .000 |
|                                   | Within Groups  | .204           | 10 | .020        |         |      |
|                                   | Total          | 31.549         | 14 |             |         |      |
|                                   |                |                |    |             |         |      |
| Biomass (g/L)                     | Between Groups | 90.376         | 4  | 22.594      | 205.679 | .000 |
|                                   | Within Groups  | 1.099          | 10 | .110        |         |      |
|                                   | Total          | 91.475         | 14 |             |         |      |
|                                   |                |                |    |             |         |      |

### Astaxanthin content (µg/g DCW)



| Temperature  |       | N | Subset for alpha = 0.05 |           |           |
|--------------|-------|---|-------------------------|-----------|-----------|
|              |       |   | 1                       | 2         | 3         |
| Tukey HSD(a) | 35 °C | 3 | 116.62667               |           |           |
|              | 30 °C | 3 |                         | 235.62667 |           |
|              | 25 °C | 3 |                         |           | 311.98667 |
|              | 20 °C | 3 |                         |           | 314.00000 |
|              | 15 °C | 3 |                         |           | 328.10333 |
|              | Sig.  |   | 1.000                   | 1.000     | .284      |
| Duncan(a)    | 35 °C | 3 | 116.62667               |           |           |
|              | 30 °C | 3 |                         | 235.62667 |           |
|              | 25 °C | 3 |                         |           | 311.98667 |
|              | 20 °C | 3 |                         |           | 314.00000 |
|              | 15 °C | 3 |                         |           | 328.10333 |
|              | Sig.  |   | 1.000                   | 1.000     | .070      |

Means for groups in homogeneous subsets are displayed.

a Uses Harmonic Mean Sample Size = 3.000.

#### Astaxanthin yield (mg/L)

| Tempera-<br>ture |       | N | Subset for alpha = 0.05 |         |         |         |         |
|------------------|-------|---|-------------------------|---------|---------|---------|---------|
|                  |       |   | 1                       | 2       | 3       | 4       | 5       |
| Tukey<br>HSD(a)  | 35 °C | 3 | 1.26133                 |         |         |         |         |
|                  | 30 °C | 3 |                         | 3.98643 |         |         |         |
|                  | 15 °C | 3 |                         | 4.30807 |         |         |         |
|                  | 20 °C | 3 |                         |         | 4.95633 |         |         |
|                  | 25 °C | 3 |                         |         |         | 5.39293 |         |
| Duncan(a)        | Sig.  |   | 1.000                   | .113    | 1.000   | 1.000   |         |
|                  | 35 °C | 3 | 1.26133                 |         |         |         |         |
|                  | 30 °C | 3 |                         | 3.98643 |         |         |         |
|                  | 15 °C | 3 |                         |         | 4.30807 |         |         |
|                  | 20 °C | 3 |                         |         |         | 4.95633 |         |
|                  | 25 °C | 3 |                         |         |         |         | 5.39293 |
|                  | Sig.  |   | 1.000                   | 1.000   | 1.000   | 1.000   | 1.000   |

Means for groups in homogeneous subsets are displayed.

a Uses Harmonic Mean Sample Size = 3.000.

#### Biomass (g/L)

| Temperature  |       | N | Subset for alpha = 0.05 |          |          |          |
|--------------|-------|---|-------------------------|----------|----------|----------|
|              |       |   | 1                       | 2        | 3        | 4        |
| Tukey HSD(a) | 35 °C | 3 | 10.83600                |          |          |          |
|              | 15 °C | 3 |                         | 13.13067 |          |          |
|              | 20 °C | 3 |                         |          | 15.78667 |          |
|              | 30 °C | 3 |                         |          |          | 16.91867 |
|              | 25 °C | 3 |                         |          |          | 17.28267 |
|              | Sig.  |   | 1.000                   | 1.000    | 1.000    | .672     |
| Duncan(a)    | 35 °C | 3 | 10.83600                |          |          |          |
|              | 15 °C | 3 |                         | 13.13067 |          |          |
|              | 20 °C | 3 |                         |          | 15.78667 |          |

|       |   |       |       |       |          |
|-------|---|-------|-------|-------|----------|
| 30 °C | 3 |       |       |       | 16.91867 |
| 25 °C | 3 |       |       |       | 17.28267 |
| Sig.  |   | 1.000 | 1.000 | 1.000 | .208     |

Means for groups in homogeneous subsets are displayed.

a Uses Harmonic Mean Sample Size = 3.000.

**Statistical supplementary Table S7** The effect of incubation period on astaxanthin production and growth of *Rhodotorula* sp. CP72-2

#### ANOVA

|                                |                | Sum of Squares | df | Mean Square | F        | Sig. |
|--------------------------------|----------------|----------------|----|-------------|----------|------|
| Astaxanthin content (µg/g DCW) | Between Groups | 13560.368      | 3  | 4520.123    | 110.617  | .000 |
|                                | Within Groups  | 326.903        | 8  | 40.863      |          |      |
|                                | Total          | 13887.271      | 11 |             |          |      |
| Astaxanthin yield (mg/L)       | Between Groups | 20.625         | 3  | 6.875       | 572.792  | .000 |
|                                | Within Groups  | .096           | 8  | .012        |          |      |
|                                | Total          | 20.721         | 11 |             |          |      |
| Productivity (mg/L/day)        | Between Groups | 1.168          | 3  | .389        | 196.258  | .000 |
|                                | Within Groups  | .016           | 8  | .002        |          |      |
|                                | Total          | 1.184          | 11 |             |          |      |
| Biomass (g/L)                  | Between Groups | 210.196        | 3  | 70.065      | 1107.446 | .000 |
|                                | Within Groups  | .506           | 8  | .063        |          |      |
|                                | Total          | 210.702        | 11 |             |          |      |

#### Astaxanthin content (µg/g DCW)

| Time         |        | N | Subset for alpha = 0.05 |           |           |
|--------------|--------|---|-------------------------|-----------|-----------|
|              |        |   | 1                       | 2         | 3         |
| Tukey HSD(a) | 1 day  | 3 | 198.02667               | 240.63667 | 274.94000 |
|              | 3 days | 3 |                         |           |           |
|              | 5 days | 3 |                         |           |           |
|              | 7 days | 3 |                         |           |           |
|              | Sig.   |   | 1.000                   | 1.000     | .425      |
| Duncan(a)    | 1 day  | 3 | 198.02667               | 240.63667 | 274.94000 |
|              | 3 days | 3 |                         |           |           |
|              | 5 days | 3 |                         |           |           |
|              | 7 days | 3 |                         |           |           |
|              | Sig.   |   | 1.000                   | 1.000     | .146      |

Means for groups in homogeneous subsets are displayed.

a Uses Harmonic Mean Sample Size = 3.000.

### Astaxanthin yield (mg/L)

|        |        | N | Subset for alpha = 0.05 |         |         |
|--------|--------|---|-------------------------|---------|---------|
| Time   |        |   | 1                       | 2       | 3       |
| Tukey  | 1 day  | 3 | 1.34997                 |         |         |
| HSD(a) | 3 days | 3 |                         | 4.13250 |         |
|        | 7 days | 3 |                         |         | 4.46757 |
|        | 5 days | 3 |                         |         | 4.48120 |
|        | Sig.   |   | 1.000                   | 1.000   | .999    |
| Dun-   | 1 day  | 3 | 1.34997                 |         |         |
| can(a) | 3 days | 3 |                         | 4.13250 |         |
|        | 7 days | 3 |                         |         | 4.46757 |
|        | 5 days | 3 |                         |         | 4.48120 |
|        | Sig.   |   | 1.000                   | 1.000   | .883    |

Means for groups in homogeneous subsets are displayed.

a Uses Harmonic Mean Sample Size = 3.000.

### Productivity (mg/L/day)

|            |        | N | Subset for alpha = 0.05 |        |         |
|------------|--------|---|-------------------------|--------|---------|
| Time       |        |   | 1                       | 2      | 3       |
| Tukey      | 7 days | 3 | .63823                  |        |         |
| HSD(a)     | 5 days | 3 |                         | .89624 |         |
|            | 1 day  | 3 |                         |        | 1.34994 |
|            | 3 days | 3 |                         |        | 1.37750 |
|            | Sig.   |   | 1.000                   | 1.000  | .871    |
| Dun-can(a) | 7 days | 3 | .63823                  |        |         |
|            | 5 days | 3 |                         | .89624 |         |
|            | 1 day  | 3 |                         |        | 1.34994 |
|            | 3 days | 3 |                         |        | 1.37750 |
|            | Sig.   |   | 1.000                   | 1.000  | .470    |

Means for groups in homogeneous subsets are displayed.

a Uses Harmonic Mean Sample Size = 3.000.

### Biomass (g/L)

| Time         |        | N | Subset for alpha = 0.05 |          |   |   |
|--------------|--------|---|-------------------------|----------|---|---|
|              |        |   | 1                       | 2        | 3 | 4 |
| Tukey HSD(a) | 1 day  | 3 | 6.81667                 |          |   |   |
|              | 7 days | 3 |                         | 15.76933 |   |   |
|              | 5 days | 3 |                         | 16.29733 |   |   |

|           |        |   |         |          |          |          |
|-----------|--------|---|---------|----------|----------|----------|
| Duncan(a) | 3 days | 3 |         |          | 17.17133 |          |
|           | Sig.   |   | 1.000   | .122     | 1.000    |          |
|           | 1 day  | 3 | 6.81667 |          |          |          |
|           | 7 days | 3 |         | 15.76933 |          |          |
|           | 5 days | 3 |         |          | 16.29733 |          |
|           | 3 days | 3 |         |          |          | 17.17133 |
|           | Sig.   |   | 1.000   | 1.000    | 1.000    | 1.000    |

Means for groups in homogeneous subsets are displayed.

a Uses Harmonic Mean Sample Size = 3.000.
